# Supplementary material for: Resource-dependent attenuation of species interactions during bacterial succession
Source: PubMed Central journal article supplement (PMC4989303; doi:10.1038/ismej.2016.11), 2016-02-19

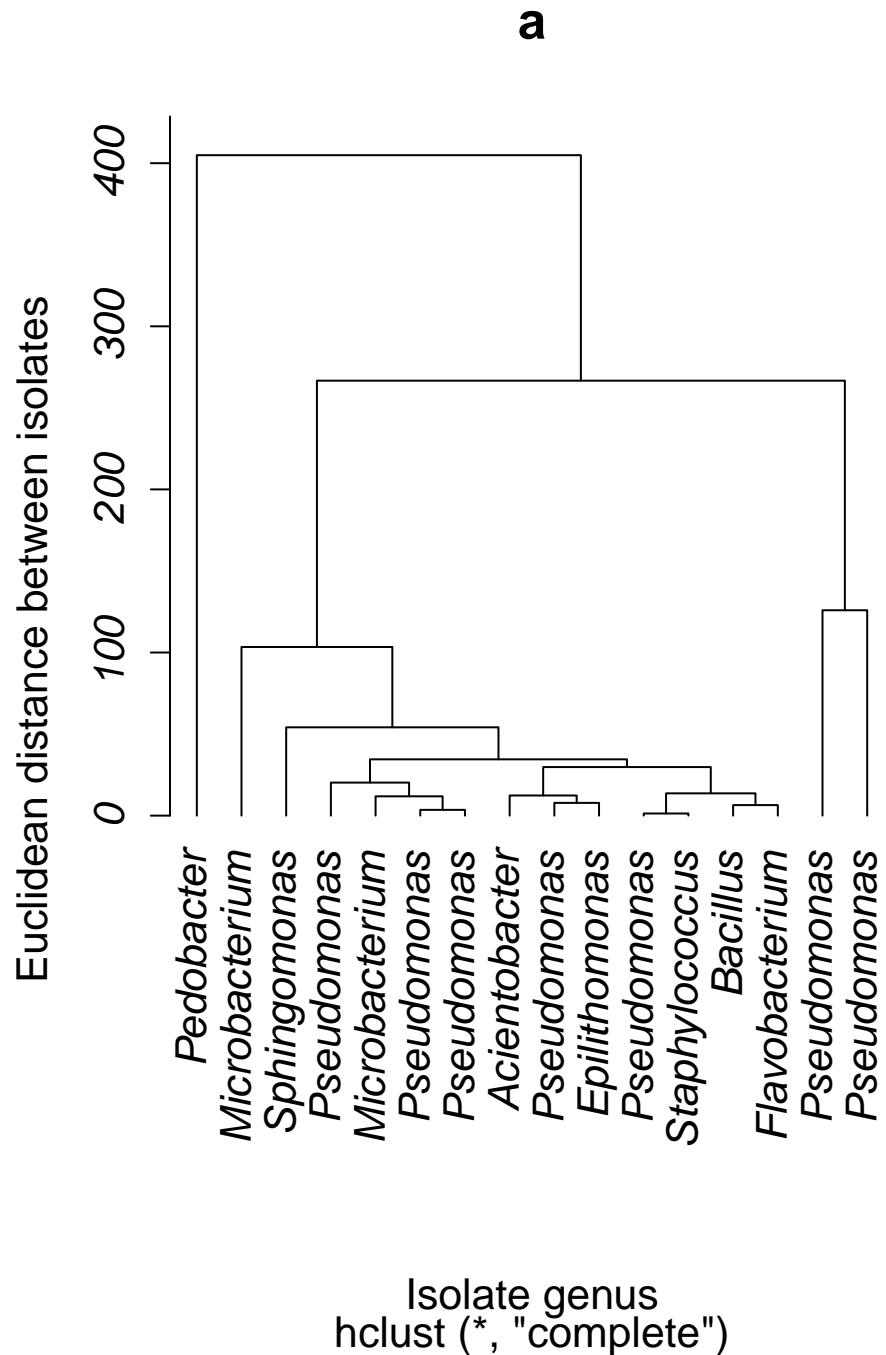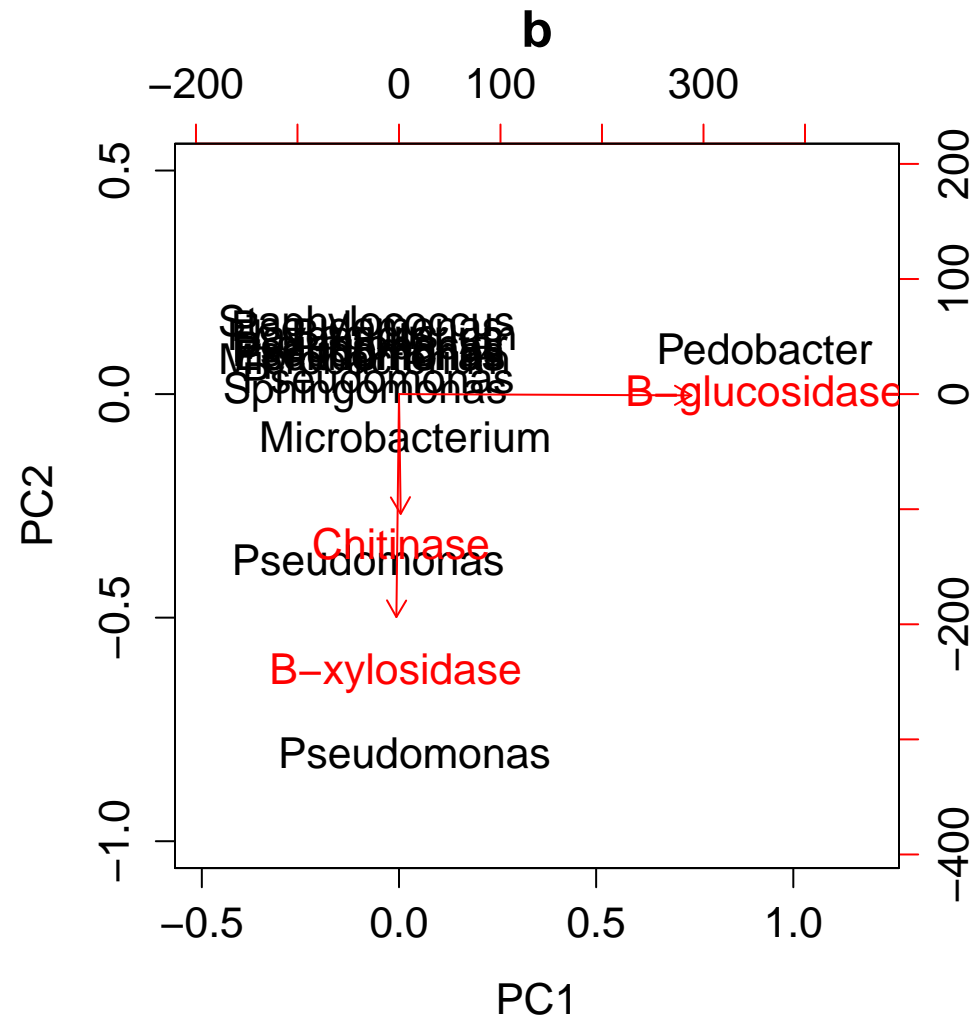

Supplement: ismej201611x4.pdf [file ismej201611x4.pdf]
